# Supplementary material
Source: MDPI journal article supplement (https://www.mdpi.com/2072-4292/12/23/3900)
Supplement: s1 [file s1]

# A simple spatio-temporal data fusion method based on linear regression coefficient compensation

Bingxin Bai <sup>1,2,3</sup>, Yumin Tan <sup>1, \*</sup>, Gennadii Donchyts <sup>3</sup>, Arjen Haag <sup>3</sup> and Albrecht Weerts <sup>2,3</sup>

<sup>1</sup> School of Transportation Science and Engineering, Beihang University, Beijing 100191; baibx@buaa.edu.cn

<sup>2</sup> Hydrology and Quantitative Water Management group, Department of Environmental Sciences, Wageningen University, Wageningen 6700 AA; albrecht.weerts@deltares.nl

<sup>3</sup> Deltares, Delft 2629 HV, The Netherlands; Gennadii.Donchyts@deltares.nl (G.D.); Arjen.Haag@deltares.nl (A.H.)

\* Correspondence: tanyum@buaa.edu.cn; Tel.: +86-13520825560

## Zone1

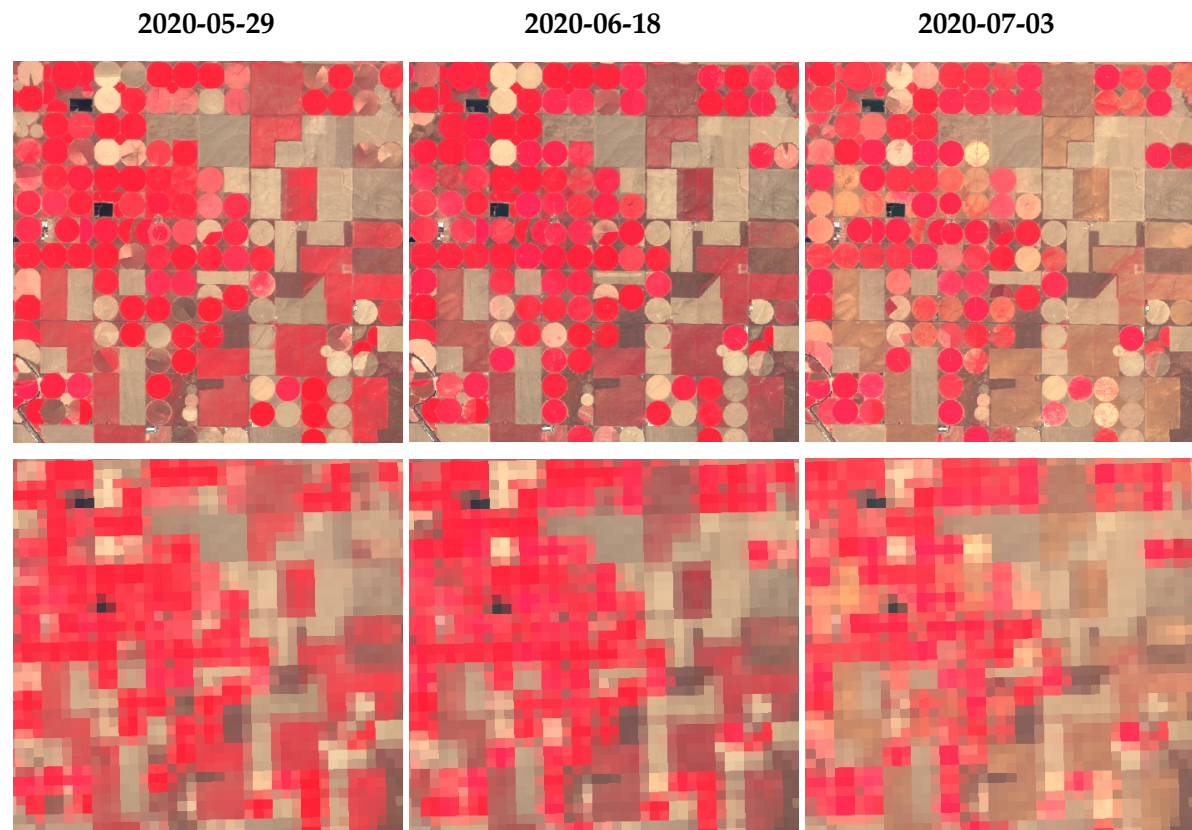

**Figure S1.** Color composited images (RGB: near-infrared, red, green) of zone 1. (a)-(c) are Sentinel-2 images acquired on May 29, June 18, and July 3, 2020, respectively (1230 × 1200 pixels with 10m resolution), and (d)-(f) are Sentinel-3 like images aggregated from (a)-(c).

## Zone2

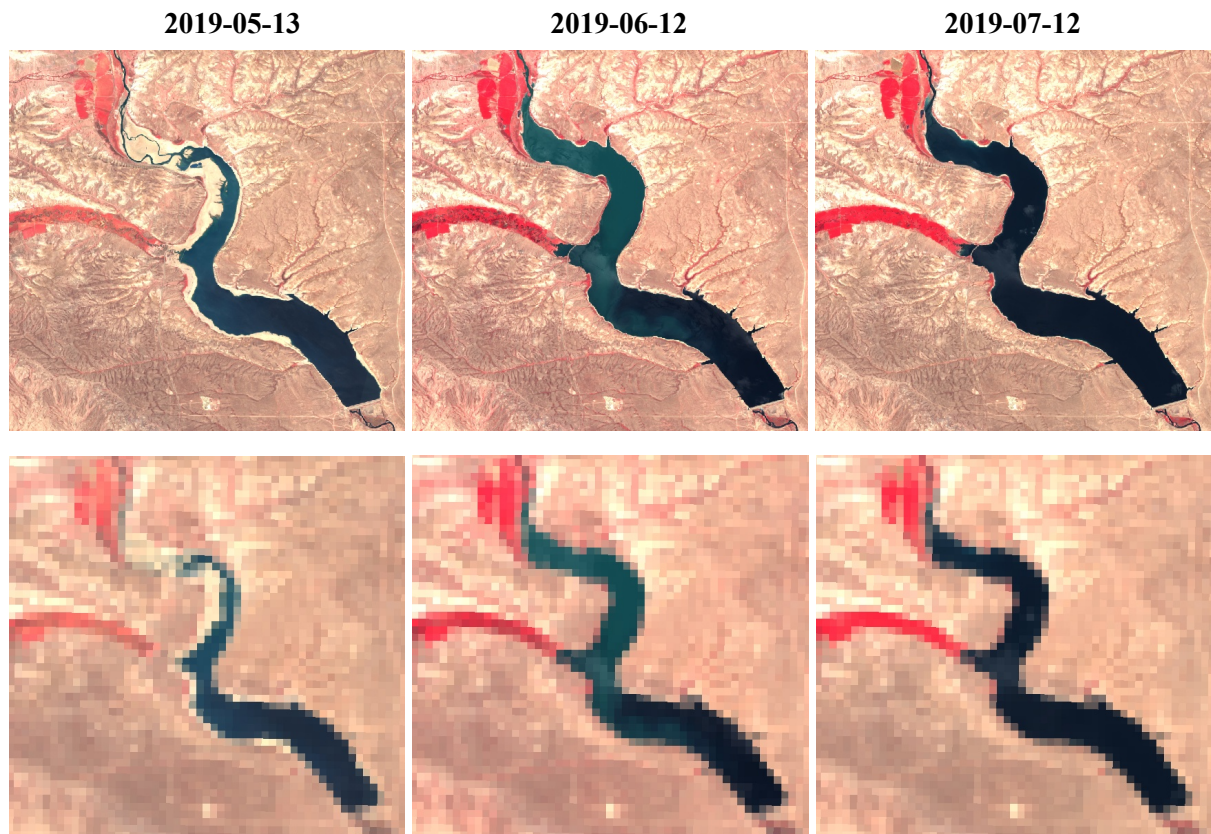

**Figure S2.** Color composited images (RGB: near-infrared, red, green) of zone 2. (a)-(c) are Sentinel-2 images acquired on May 13, June 12, and July 12, 2019, respectively ( $1530 \times 1500$  pixels with 10m resolution), and (d)-(f) are Sentinel-3 like images aggregated from (a)-(c).

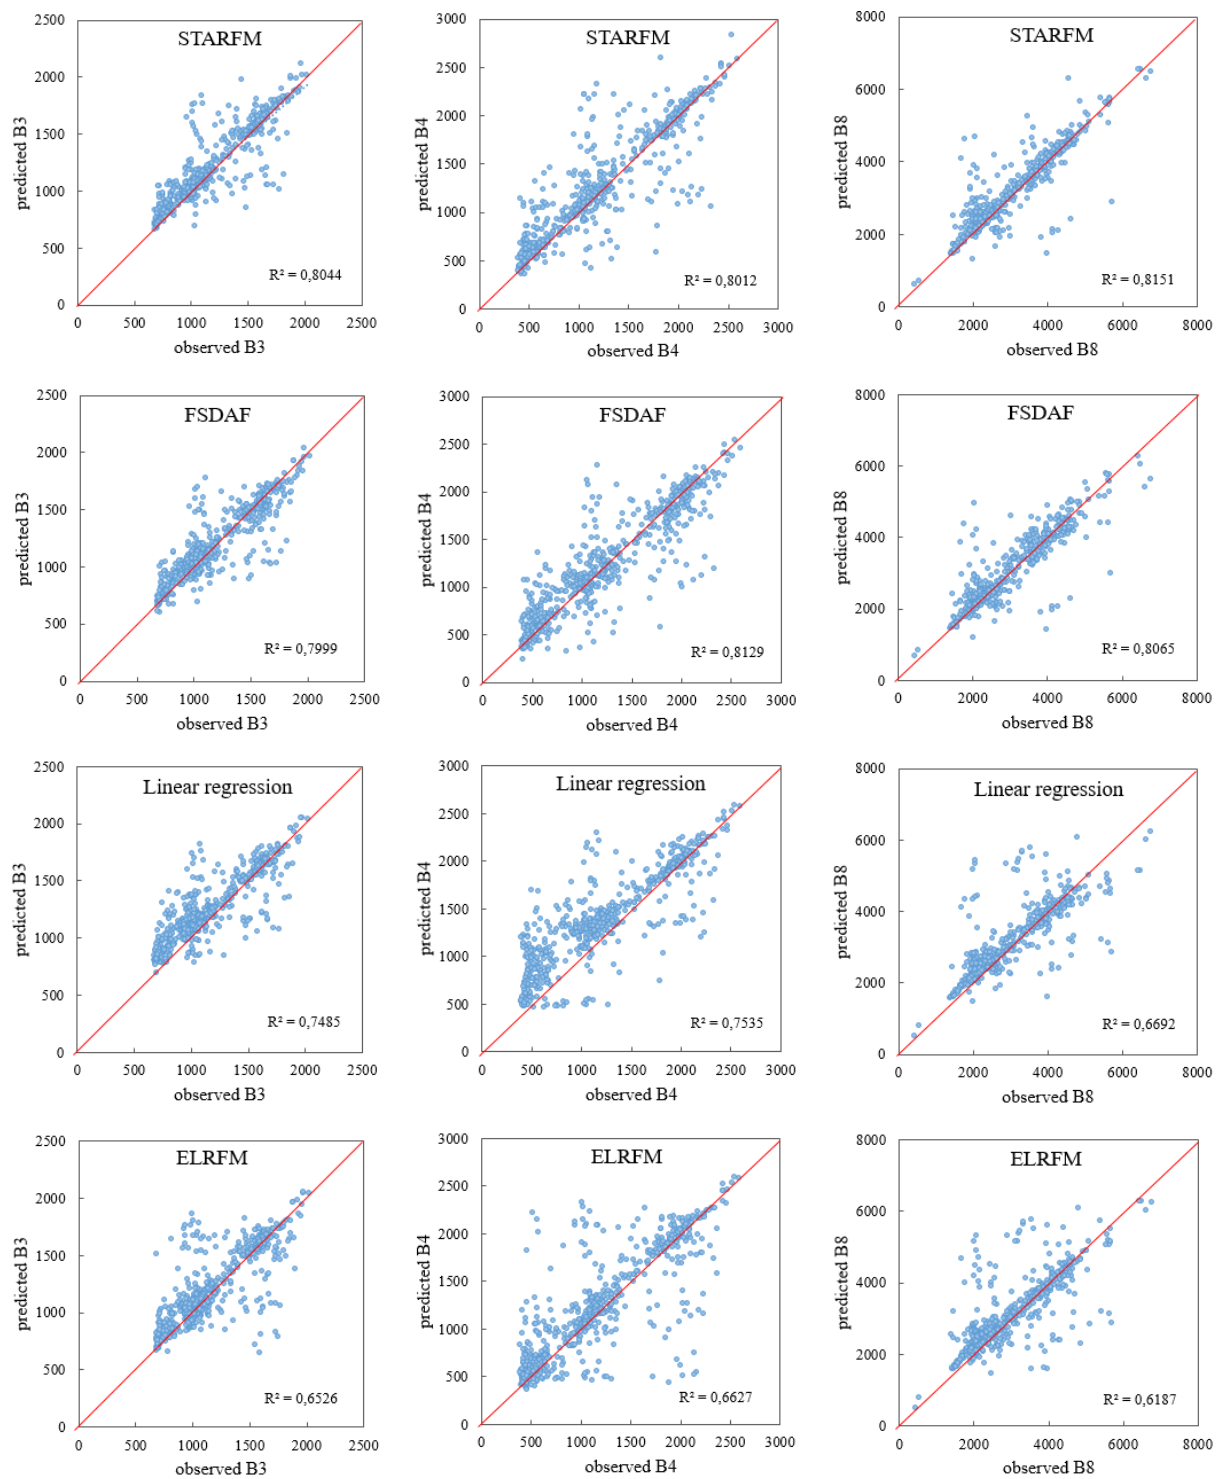

**Figure S3.** Scatter plots of the observed and predicted reflectance of zone 1 from the four data fusion methods in green (B3), red (B4), and near-infrared (B8) bands, respectively.

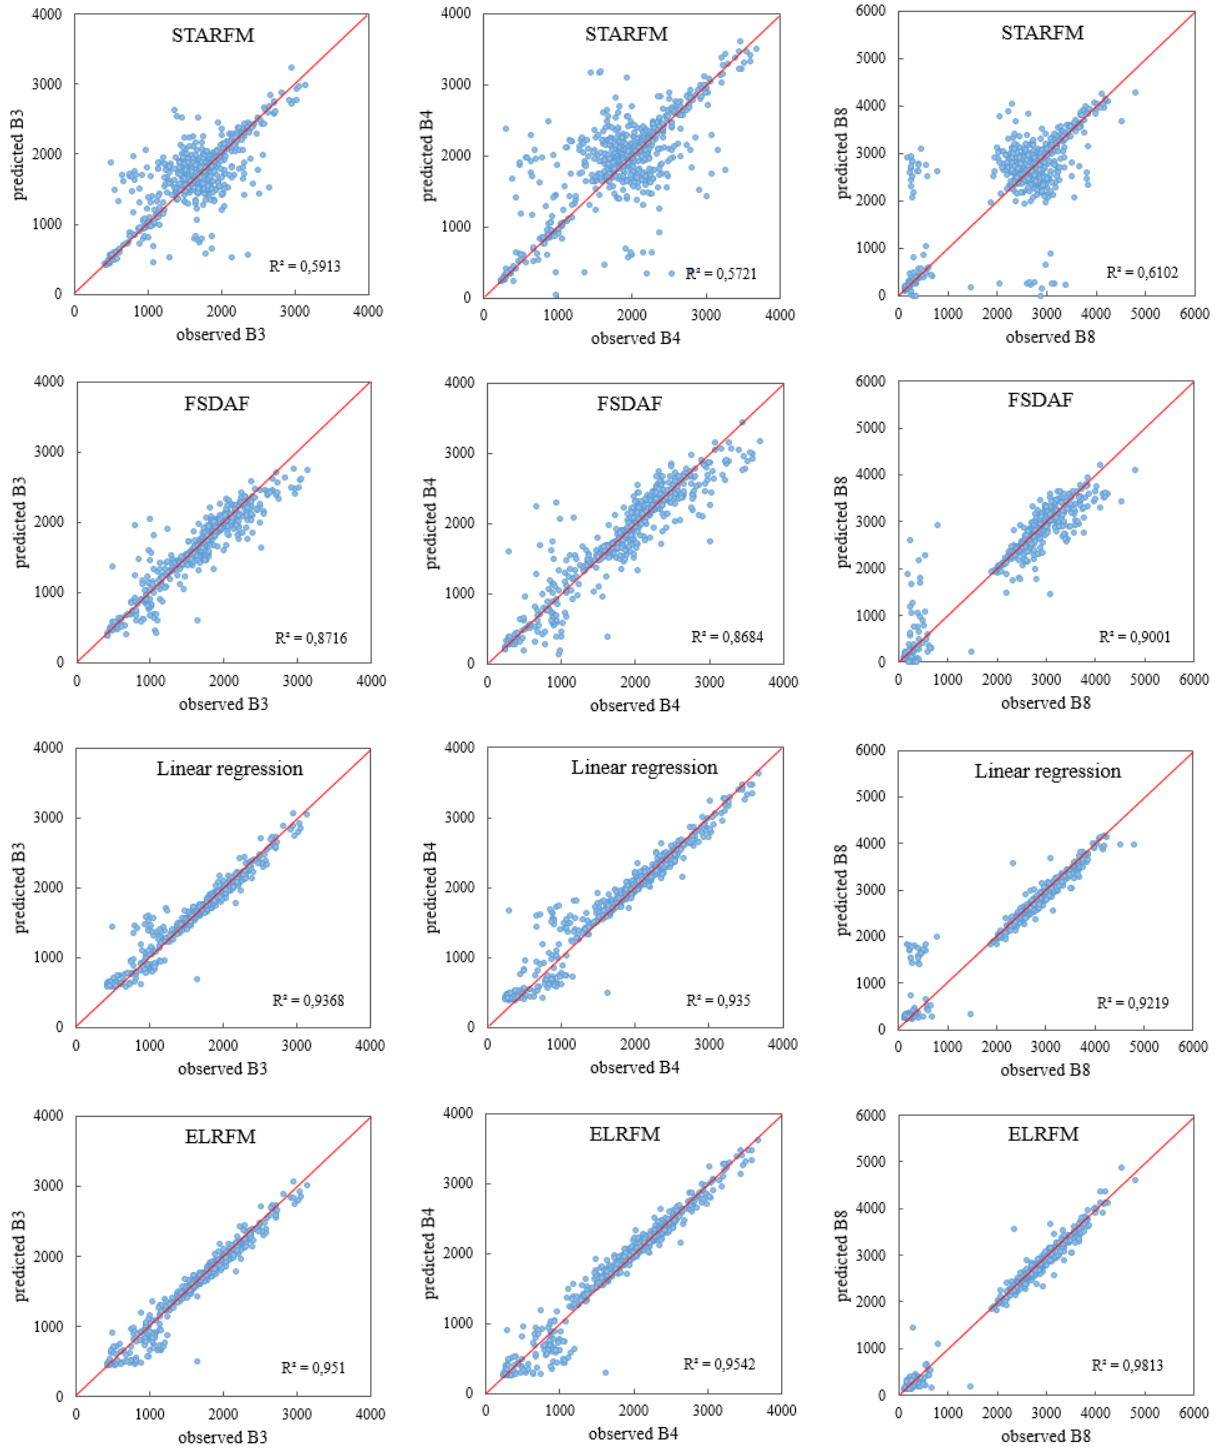

**Figure S4.** Scatter plots of the observed and predicted reflectance of zone 2 from the four data fusion methods in green (B3), red (B4), and near-infrared (B8) bands, respectively.

**Table S1.** Accuracy assessment results of the four data fusion methods. Root mean square error (RMSE), average difference (AD), average absolute difference (AAD), and correlation coefficient  $r$ , near-infrared (NIR).

| Test area | methods | band  | RMSE            | AAD             | AD       | r             |
|-----------|---------|-------|-----------------|-----------------|----------|---------------|
| Zone 1    | STARFM  | Green | 98.7149         | <b>57.8414</b>  | 21.6511  | 0.9583        |
|           |         | Red   | 183.7494        | <b>106.2487</b> | 32.7362  | 0.9539        |
|           |         | NIR   | 297.9262        | <b>156.8831</b> | 73.8347  | <b>0.9602</b> |
|           | FSDAF   | Green | <b>94.1787</b>  | 67.0618         | -5.4023  | <b>0.9609</b> |
|           |         | Red   | 172.6924        | 124.0634        | -13.3957 | 0.9587        |
|           |         | NIR   | <b>293.4198</b> | 180.6945        | 11.1519  | 0.9584        |
|           | LR      | Green | 147.8665        | 109.2354        | 74.0301  | 0.9268        |
|           |         | Red   | 282.5593        | 206.8130        | 152.2220 | 0.9203        |
|           |         | NIR   | 513.0738        | 290.3055        | 100.1419 | 0.8726        |
|           | ELRFM   | Green | 103.5851        | 72.9165         | 29.2471  | 0.9553        |
|           |         | Red   | <b>171.6058</b> | 116.0668        | 34.17362 | <b>0.9600</b> |
|           |         | NIR   | 478.9367        | 255.1953        | 100.3105 | 0.8920        |
| Zone 2    | STARFM  | Green | 146.2280        | 75.1429         | 32.5486  | 0.9553        |
|           |         | Red   | 198.8543        | 101.99          | 48.8614  | 0.9572        |
|           |         | NIR   | 296.2853        | 115.3386        | 51.2386  | 0.9530        |
|           | FSDAF   | Green | 173.6718        | 102.1443        | -14.6843 | 0.9336        |
|           |         | Red   | 243.1650        | 145.03          | -20.3586 | 0.9319        |
|           |         | NIR   | 303.7477        | 160.3443        | -12.7443 | 0.9487        |
|           | LR      | Green | 123.6636        | 71.4557         | 3.7986   | 0.9679        |
|           |         | Red   | 174.3240        | 99.9929         | 35.0814  | 0.9670        |
|           |         | NIR   | 278.3925        | 138.0814        | -14.7129 | 0.9602        |
|           | ELRFM   | Green | <b>111.0748</b> | <b>67.2714</b>  | -26.6257 | <b>0.9752</b> |
|           |         | Red   | <b>145.2351</b> | <b>89.6814</b>  | -5.6671  | <b>0.9768</b> |
|           |         | NIR   | <b>144.7377</b> | <b>96.8714</b>  | -61.1029 | <b>0.9906</b> |

The bold numbers indicate the best accuracy.
